# Supplementary material for: Food Safety Knowledge, Attitudes, and Practices of Street Food Vendors and Microbiological Quality of Selected Street Foods in Bahir Dar City, Ethiopia
Source: Research Square preprint supplement (doi:10.21203/rs.3.rs-7958922/v1), 2025-10-29
Supplement: Supplementary file 1 [file 764c85469ebb42e23de079ee.docx]

**CONSENT LETTER**

Participant Information Sheet and Informed Consent Form

Dear Participant**,**

You are invited to take part in a research study titled “Quantitative Assessment of Street Foods.” The purpose of this study is to assess Food Safety Knowledge, Attitudes, and Practices of Street Food Vendors and consumers.

Your participation is voluntary. The interview will take approximately 15–20 minutes. There are no foreseeable risks or direct benefits, but your input will contribute to improving public food-safety awareness.

All information you provide will remain strictly confidential and used only for research purposes. You may refuse to answer any question or withdraw at any time without penalty.

If you agree to participate, please sign below to confirm your voluntary consent.

| **Participant Consent** | **Response** |
| --- | --- |
| I agree to participate in this study under the conditions described above. | ☐ Yes  ☐ No |
| **Participant Signature** | __________________________ |
| **Date** | __________________________ |
| **Observer / Enumerator Signature** | __________________________ |

**APPENDIX A**

**Participant Information Sheet and Informed Consent Form**

**A1. Introduction and Objective**

This study assesses the Food Safety Knowledge, Attitudes, and Practices of Street Food Vendors and Consumers in Bahir Dar City. Your participation will help improve food-hygiene awareness and Policy based Standard Operating Procedures for street foods.

**A2. Procedures**

If you agree to participate, you will answer a short questionnaire (about 15–20 minutes) concerning your experience, knowledge, and hygiene practices regarding street foods.

**A3. Confidentiality**

All information you provide will remain confidential. No names or identifying details will appear in any report. Data will be stored securely and used only for academic purposes.

**A4. Voluntary Participation and Withdrawal**

Your participation is entirely voluntary. You may refuse to answer any question or withdraw from the study at any time without penalty.

**A5. Risks and Benefits**

There are no foreseeable risks to you. Although there is no direct personal benefit, your contribution will help improve food safety among vendors and consumers.

| **Participant Consent** | **Response** |
| --- | --- |
| I have read (or had read to me) the information above and agree to take part in this study. | ☐ Yes  ☐ No |
| **Participant Signature** | __________________________ |
| **Date** | __________________________ |
| **Observer / Enumerator Signature** | __________________________ |

**APPENDIX B.**

**STREET FOOD VENDORS AND CONSUMERS QUESTIONNAIRE**

This structured questionnaire was used to assess demographic characteristics, food-safety knowledge, attitudes, and practices among street-food vendors and consumers in Bahir Dar City.

**Table B1. Demographic Characteristics of Respondents**

| **Variable** | **Category / Response Options** |
| --- | --- |
| **Sex** | ☐ Male  ☐ Female |
| **Age (Years)** | ☐ 15–25 ☐ 26–35 ☐ 36–45 ☐ 46–55 ☐ 56–60 ☐ > 60 |
| **Education Level** | ☐ Illiterate ☐ Primary School ☐ High School ☐ College/University |
| **Food Safety Training** | ☐ Yes ☐ No |
| **Location (Sub-city)** | _______________________________ |

**Table B2. Assessment of Food Safety Knowledge**

| **No.** | **Question** | **Response Options** |
| --- | --- | --- |
| 1 | Abortion in pregnant women can be induced by food-borne disease. | ☐ Correct ☐ Wrong ☐ Don’t Know |
| 2 | Bloody diarrhea can be transmitted by food. | ☐ Correct ☐ Wrong ☐ Don’t Know |
| 3 | Swollen cans can contain microorganisms. | ☐ Correct ☐ Wrong ☐ Don’t Know |
| 4 | During skin infection, food handlers should stop work. | ☐ Correct ☐ Wrong ☐ Don’t Know |
| 5 | Eating and drinking in the work area increases food contamination. | ☐ Correct ☐ Wrong ☐ Don’t Know |
| 6 | Hepatitis A virus is food-borne. | ☐ Correct ☐ Wrong ☐ Don’t Know |
| 7 | Microbes exist on the skin, nose, and mouth of healthy handlers. | ☐ Correct ☐ Wrong ☐ Don’t Know |
| 8 | Salmonella is a food-borne pathogen. | ☐ Correct ☐ Wrong ☐ Don’t Know |
| 9 | Staphylococcus is a food-borne pathogen. | ☐ Correct ☐ Wrong ☐ Don’t Know |
| 10 | Typhoid fever can be transmitted by food. | ☐ Correct ☐ Wrong ☐ Don’t Know |
| 11 | Using gloves while handling food reduces contamination risk. | ☐ Correct ☐ Wrong ☐ Don’t Know |
| 12 | Washing hands before work reduces contamination risk. | ☐ Correct ☐ Wrong ☐ Don’t Know |
| 13 | AIDS can be transmitted by food. | ☐ Correct ☐ Wrong ☐ Don’t Know |
| 14 | All population groups have equal risk of food poisoning. | ☐ Correct ☐ Wrong ☐ Don’t Know |
| 15 | Food prepared in advance increases contamination risk. | ☐ Correct ☐ Wrong ☐ Don’t Know |
| 16 | Proper cleaning and sanitizing of utensils prevents contamination. | ☐ Correct ☐ Wrong ☐ Don’t Know |
| 17 | Reheating cooked foods can cause contamination. | ☐ Correct ☐ Wrong ☐ Don’t Know |
| 18 | Washing utensils with detergent leaves them contamination-free. | ☐ Correct ☐ Wrong ☐ Don’t Know |

**Table B3. Assessment of Food Safety Attitudes**

| **No.** | **Statement** | **Response Options** |
| --- | --- | --- |
| 1 | Proper hand hygiene prevents food-borne disease. | ☐ Agree ☐ Disagree |
| 2 | Raw and cooked foods must be stored separately. | ☐ Agree ☐ Disagree |
| 3 | Refrigerator temperature should be checked regularly. | ☐ Agree ☐ Disagree |
| 4 | Workers’ health should be evaluated before employment. | ☐ Agree ☐ Disagree |
| 5 | Wearing masks reduces food-contamination risk. | ☐ Agree ☐ Disagree |
| 6 | Wearing gloves reduces food-contamination risk. | ☐ Agree ☐ Disagree |
| 7 | Wearing caps reduces food-contamination risk. | ☐ Agree ☐ Disagree |
| 8 | Dish towels can cause food contamination. | ☐ Agree ☐ Disagree |
| 9 | Knives and cutting boards should be sanitized after use. | ☐ Agree ☐ Disagree |
| 10 | Food handlers with wounds should not touch food bare-handed. | ☐ Agree ☐ Disagree |
| 11 | Well-cooked foods are free of contamination. | ☐ Agree ☐ Disagree |
| 12 | Defrosted foods can be refrozen safely. | ☐ Agree ☐ Disagree |
| 13 | Raw meat should be stored on the bottom shelf of the refrigerator. | ☐ Agree ☐ Disagree |
| 14 | Eggs must be washed immediately after purchase. | ☐ Agree ☐ Disagree |

**Table B4. Assessment of Food Safety Practices**

| **No.** | **Practice Item** | **Response Options** |
| --- | --- | --- |
| 1 | Do you wash hands before preparing food? | ☐ Yes ☐ No |
| 2 | Do you separate raw and cooked food? | ☐ Yes ☐ No |
| 3 | Do you clean utensils after every use? | ☐ Yes ☐ No |
| 4 | Do you cover food during storage and display? | ☐ Yes ☐ No |
| 5 | Do you wear protective clothing while handling food? | ☐ Yes ☐ No |

**Table B5. Sanitation Practices Perceived by Consumers**

| **No.** | **Activity** | **Response Options** |
| --- | --- | --- |
| 1 | The working area is clean. | ☐ Agree ☐ Strongly Agree ☐ Disagree |
| 2 | Utensils used are clean. | ☐ Agree ☐ Strongly Agree ☐ Disagree |
| 3 | Hairnets, gloves, and aprons are used. | ☐ Agree ☐ Strongly Agree ☐ Disagree |
| 4 | Cooked and raw foods are separated. | ☐ Agree ☐ Strongly Agree ☐ Disagree |
| 5 | Spoons or tongs are provided to avoid hand contact. | ☐ Agree ☐ Strongly Agree ☐ Disagree |
| 6 | Area is orderly and odor-free. | ☐ Agree ☐ Strongly Agree ☐ Disagree |
| 7 | Trash containers are clean on the outside. | ☐ Agree ☐ Strongly Agree ☐ Disagree |
| 8 | All containers have tight-fitting covers. | ☐ Agree ☐ Strongly Agree ☐ Disagree |
| 9 | Grill pans are clean, not greasy or smoky. | ☐ Agree ☐ Strongly Agree ☐ Disagree |
| 10 | Previously cooked food is not placed over freshly cooked food. | ☐ Agree ☐ Strongly Agree ☐ Disagree |

**APPENDIX C. FOOD SAFETY OBSERVATION CHECKLIST**

This checklist was used for direct on-site assessment of food-handling and hygiene practices among street-food vendors.
Each item was observed and rated **Yes / No / Corrective Action Required (CAR)**.

**Table C1. Personal Hygiene Observation**

| **No.** | **Observation Item** | **Yes** | **No** | **CAR** |
| --- | --- | --- | --- | --- |
| 1 | Employees wear clean, proper uniforms and shoes. | ☐ | ☐ | ☐ |
| 2 | Hair restraints (caps, nets) are properly worn. | ☐ | ☐ | ☐ |
| 3 | Fingernails are short, unpolished, and clean. | ☐ | ☐ | ☐ |
| 4 | Only a plain ring (e.g., wedding band) is worn. | ☐ | ☐ | ☐ |
| 5 | Hands are washed properly and frequently. | ☐ | ☐ | ☐ |
| 6 | Eating/drinking limited to designated areas. | ☐ | ☐ | ☐ |
| 7 | Employees use tissues when coughing/sneezing. | ☐ | ☐ | ☐ |
| 8 | Employees appear in good health. | ☐ | ☐ | ☐ |
| 9 | Hand sinks are unobstructed and clean. | ☐ | ☐ | ☐ |
| 10 | Hand sinks supplied with soap, towels, warm water. | ☐ | ☐ | ☐ |
| 11 | Hand-washing reminder sign is posted. | ☐ | ☐ | ☐ |
| 12 | Restrooms are operational and sanitary. | ☐ | ☐ | ☐ |

**Table C2. Food Preparation Observation**

| **No.** | **Observation Item** | **Yes** | **No** | **CAR** |
| --- | --- | --- | --- | --- |
| 1 | All food originates from approved sources. | ☐ | ☐ | ☐ |
| 2 | Utensils and contact surfaces sanitized before use. | ☐ | ☐ | ☐ |
| 3 | Food is tasted using proper utensils. | ☐ | ☐ | ☐ |
| 4 | Procedures prevent cross-contamination. | ☐ | ☐ | ☐ |
| 5 | Food handled with gloves/tongs—not bare hands. | ☐ | ☐ | ☐ |
| 6 | Towels used only for sanitizing equipment/surfaces. | ☐ | ☐ | ☐ |

**Table C3. Food Storage and Dry Storage**

| **No.** | **Observation Item** | **Yes** | **No** | **CAR** |
| --- | --- | --- | --- | --- |
| 1 | Food and paper supplies stored ≥ 6 in above floor. | ☐ | ☐ | ☐ |
| 2 | FIFO (First In, First Out) method used. | ☐ | ☐ | ☐ |
| 3 | No bulging or leaking cans present. | ☐ | ☐ | ☐ |
| 4 | Food protected from contamination. | ☐ | ☐ | ☐ |
| 5 | Food-contact surfaces clean and intact. | ☐ | ☐ | ☐ |
| 6 | Food kept in original or food-grade containers. | ☐ | ☐ | ☐ |

**Table C4. Cleaning and Sanitizing**

| **No.** | **Observation Item** | **Yes** | **No** | **CAR** |
| --- | --- | --- | --- | --- |
| 1 | Wash/rinse water is clean and particle-free. | ☐ | ☐ | ☐ |
| 2 | Water temperature suitable for washing/rinsing. | ☐ | ☐ | ☐ |
| 3 | Heat sanitizing ≥ 171 °F for 30 s achieved. | ☐ | ☐ | ☐ |
| 4 | Chemical sanitizer mixed/tested correctly. | ☐ | ☐ | ☐ |
| 5 | Utensils air-dried after cleaning. | ☐ | ☐ | ☐ |
| 6 | Wiping cloths kept in sanitizer solution. | ☐ | ☐ | ☐ |

**Table C5. Utensils and Equipment**

| **No.** | **Observation Item** | **Yes** | **No** | **CAR** |
| --- | --- | --- | --- | --- |
| 1 | Knives/cutting boards cleaned & sanitized before use. | ☐ | ☐ | ☐ |
| 2 | Work surfaces cleaned & sanitized before use. | ☐ | ☐ | ☐ |
| 3 | Drawers/racks cleaned & sanitized before use. | ☐ | ☐ | ☐ |
| 4 | Clean utensils handled to avoid contamination. | ☐ | ☐ | ☐ |

**Table C6. Garbage Storage and Disposal**

| **No.** | **Observation Item** | **Yes** | **No** | **CAR** |
| --- | --- | --- | --- | --- |
| 1 | Garbage containers are clean and covered. | ☐ | ☐ | ☐ |
| 2 | Containers emptied daily/as needed. | ☐ | ☐ | ☐ |
| 3 | Boxes and containers removed from site. | ☐ | ☐ | ☐ |

**APPENDIX D. OBSERVATION SCHEDULE AND SCORING GUIDE**

**D1. Scoring Framework**

| **Response Type** | **Code Assigned** | **Description** |
| --- | --- | --- |
| **Yes / Correct / Agree** | 1 | Indicates the respondent followed or knew the correct food-safety principle. |
| **No / Wrong / Disagree** | 0 | Indicates lack of awareness or noncompliance with safe practice. |
| **Don’t Know / Not Applicable** | 0 | Treated as an incorrect or missing response for scoring. |

**D2. Calculation of Scores**

| **Score Type** | **Formula** | **Interpretation** |
| --- | --- | --- |
| **Knowledge Score (%)** | (Total Correct Answers ÷ Total Questions) × 100 | Measures respondent’s understanding of food safety. |
| **Attitude Score (%)** | (Total Positive Attitudes ÷ Total Attitude Items) × 100 | Indicates positive orientation toward food-safety practices. |
| **Practice Score (%)** | (Number of Safe Practices ÷ Total Practices) × 100 | Reflects actual implementation of food-safety measures. |
| **Observation Compliance (%)** | (Number of “Yes” Items ÷ Total Observed Items) × 100 | Evaluates the compliance level of vendors with hygiene standards. |

**D3. Interpretation of Scoring Levels**

| **Score Range (%)** | **Category** | **Interpretation** |
| --- | --- | --- |
| 80–100 | **High** | Excellent knowledge or compliance with food-safety standards. |
| 60–79 | **Moderate** | Adequate understanding or compliance; requires improvement. |
| < 60 | **Low** | Poor understanding or compliance; indicates need for urgent training. |

**D4. Example Calculation**

| **Example Parameter** | **Value** |
| --- | --- |
| Total questions = 20 | — |
| Correct answers = 15 | — |
| Knowledge Score = (15 ÷ 20) × 100 | **= 75% (Moderate Knowledge Level)** |
