# Supplementary material for: Food Safety Knowledge, Attitudes, and Practices of Street Food Vendors and Microbiological Quality of Selected Street Foods in Bahir Dar City, Ethiopia
Source: Research Square preprint supplement (doi:10.21203/rs.3.rs-7958922/v1), 2025-10-29
Supplement: Supplementary file 2 [file 9e1bc639cdee14b2b15cad17.docx]

**Highlights**

- Over 90% of street vendors lacked adequate food safety knowledge.
- All tested street foods showed high microbial contamination levels.
- *Salmonella* spp. detected in 21.9% of ready-to-eat street food samples.
- Fried fish and chips recorded the highest bacterial contamination levels.
- Vendor education strongly influenced hygiene and handling practices.
